# Supplementary material for: Measuring the dynamics of E. coli ribosome biogenesis using pulse-labeling and quantitative mass spectrometry
Source: Royal Society of Chemistry journal article supplement (doi:10.1039/c2mb25310k), 2012-10-09
Supplement: c2mb25310k_2.pdf [file c2mb25310k_2.pdf]

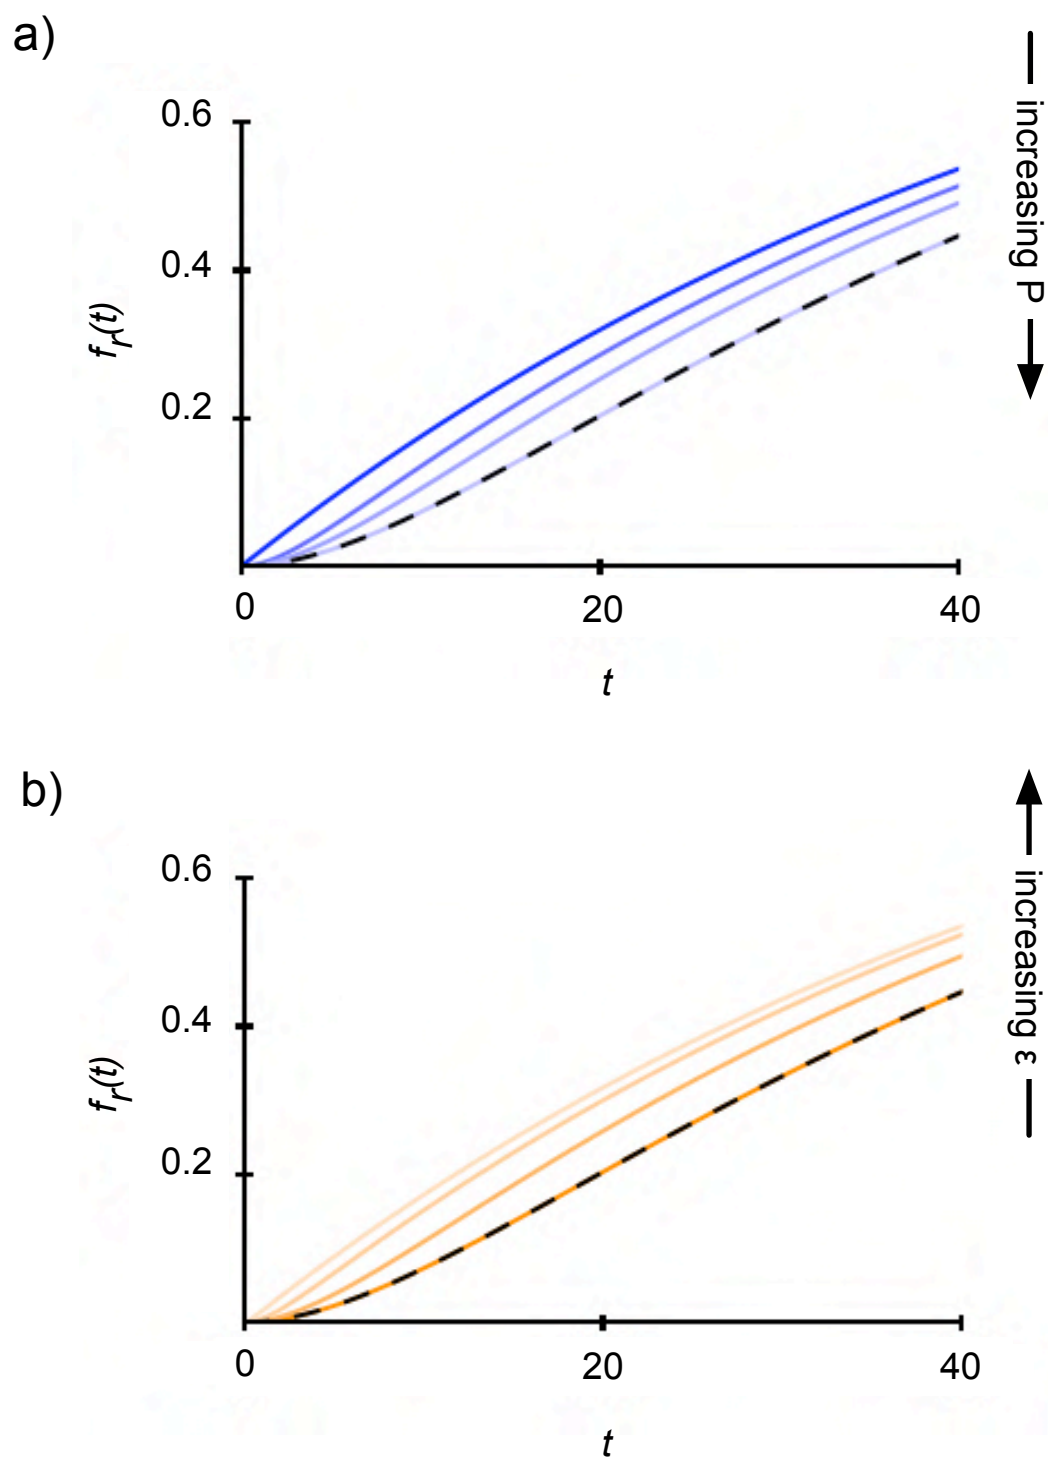

**Fig. S1** Simulations of labeling kinetics for different relative precursor pools  $\mathbf{P}$  and exchange rates  $\epsilon$ . Lines represent calculated labeling kinetics from Equations S7 and S8 (see Electronic Supplementary Information), for growth rate  $k = 0.019254$  and  $d = 0$ . (a) From top to bottom:  $\mathbf{P} = 0, 0.05, 0.1, 0.2$ ;  $\epsilon = 0$  (b) From bottom to top:  $\epsilon = 0, k, 5k, 50k$ ;  $\mathbf{P} = 0.2$ . Dotted line in both plots represent  $\mathbf{P} = 0.2$  and  $\epsilon = 0$ .

a)

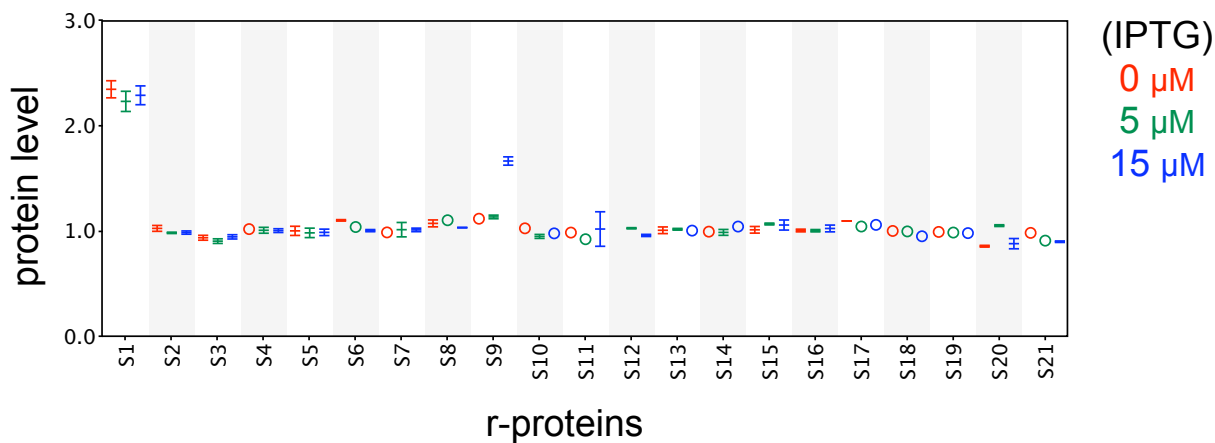

b)

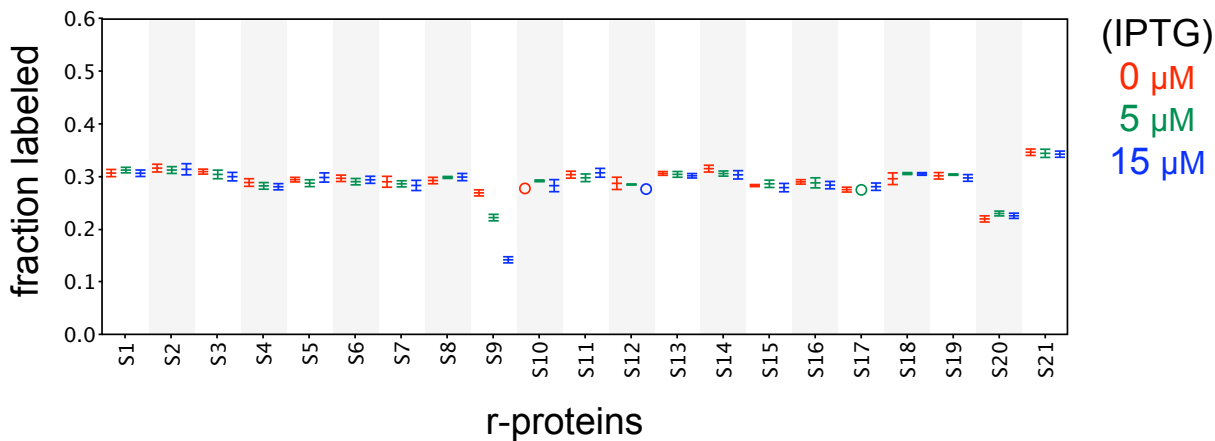

c)

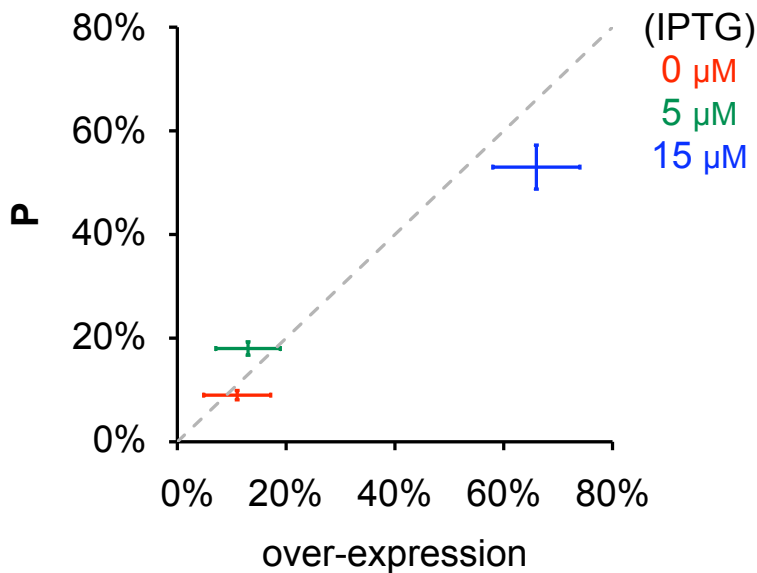

**Fig. S2** Whole-cell lysate protein level and labeling kinetics of S9 over-expression experiments. Cells carrying an inducible S9 plasmid were grown in the presence of 0  $\mu\text{M}$  (red), 5  $\mu\text{M}$  (green), and 15  $\mu\text{M}$  (blue) IPTG. (a) Protein levels of 30S r-proteins in whole-cell lysates relative to a 70S spike, defined as the ratio of r-protein in the whole cell lysate versus that of the 70S spike, normalized to the median of all 30S r-proteins except S1 and S9. (b) Pulse-labeling kinetics of 30S r-proteins in dissociated 30S subunits. (c) Plot of S9 over-expression (percent increase over 100%) versus calculated precursor pool size **P** (doubling time = 54 minutes, pulse time = 30 minutes).

| r-proteins | n <sup>a</sup> | pool <sup>b</sup> | +/- <sup>c</sup> | RCS <sup>d</sup> | turnover <sup>e</sup> | +/-          | RCS        |
|------------|----------------|-------------------|------------------|------------------|-----------------------|--------------|------------|
| S1         | 55             | <b>0.2%</b>       | <b>0.1%</b>      | <b>3.0</b>       | 0.12%                 | 0.22%        | 3.1        |
| S2         | 81             | <b>0.1%</b>       | <b>0.1%</b>      | <b>2.3</b>       | 0.00%                 | 0.16%        | 2.3        |
| S3         | 96             | <b>1.1%</b>       | <b>0.1%</b>      | <b>2.3</b>       | 0.00%                 | 0.22%        | 5.6        |
| S4         | 88             | <b>2.3%</b>       | <b>0.1%</b>      | <b>3.5</b>       | 0.00%                 | 0.43%        | 17.2       |
| S5         | 101            | <b>1.1%</b>       | <b>0.1%</b>      | <b>2.0</b>       | 0.00%                 | 0.23%        | 5.7        |
| S6         | 45             | <b>2.0%</b>       | <b>0.1%</b>      | <b>1.7</b>       | 0.00%                 | 0.56%        | 13.8       |
| S7         | 56             | <b>1.9%</b>       | <b>0.2%</b>      | <b>3.8</b>       | 0.00%                 | 0.49%        | 14.2       |
| S8         | 44             | <b>1.0%</b>       | <b>0.1%</b>      | <b>2.5</b>       | 0.00%                 | 0.33%        | 5.1        |
| S9         | 67             | <b>0.4%</b>       | <b>0.1%</b>      | <b>2.0</b>       | 0.00%                 | 0.19%        | 2.5        |
| S10        | 38             | <b>5.6%</b>       | <b>0.1%</b>      | <b>1.2</b>       | 0.00%                 | 1.36%        | 79.0       |
| S11        | 28             | <b>0.0%</b>       | <b>0.2%</b>      | <b>4.2</b>       | 0.00%                 | 0.38%        | 4.2        |
| S12        | 16             | <b>1.5%</b>       | <b>0.3%</b>      | <b>3.8</b>       | 0.00%                 | 0.74%        | 10.1       |
| S13        | 55             | <b>0.1%</b>       | <b>0.1%</b>      | <b>2.4</b>       | 0.00%                 | 0.21%        | 2.5        |
| S14        | 28             | <b>0.2%</b>       | <b>0.3%</b>      | <b>6.5</b>       | 0.00%                 | 0.50%        | 6.6        |
| S15        | 51             | <b>2.2%</b>       | <b>0.1%</b>      | <b>2.2</b>       | 0.00%                 | 0.53%        | 15.9       |
| S16        | 71             | <b>3.5%</b>       | <b>0.1%</b>      | <b>2.6</b>       | 0.00%                 | 0.71%        | 36.2       |
| S17        | 25             | <b>2.4%</b>       | <b>0.2%</b>      | <b>2.3</b>       | 0.00%                 | 0.89%        | 19.8       |
| S18        | 48             | <b>0.8%</b>       | <b>0.1%</b>      | <b>3.0</b>       | 0.00%                 | 0.30%        | 4.6        |
| S19        | 28             | <b>1.2%</b>       | <b>0.2%</b>      | <b>3.4</b>       | 0.00%                 | 0.52%        | 7.6        |
| S20L26     | 48             | 0.0%              | 0.6%             | 51.8             | <b>6.84%</b>          | <b>0.22%</b> | <b>2.4</b> |
| S21        | 56             | 0.0%              | 0.7%             | 75.4             | <b>8.39%</b>          | <b>0.22%</b> | <b>2.9</b> |
| L1         | 100            | <b>2.1%</b>       | <b>0.1%</b>      | <b>2.6</b>       | 0.00%                 | 0.37%        | 14.8       |
| L2         | 133            | <b>1.7%</b>       | <b>0.1%</b>      | <b>2.1</b>       | 0.00%                 | 0.27%        | 10.2       |
| L3         | 82             | <b>3.6%</b>       | <b>0.1%</b>      | <b>3.0</b>       | 0.00%                 | 0.70%        | 39.9       |
| L4         | 140            | <b>3.8%</b>       | <b>0.1%</b>      | <b>2.2</b>       | 0.00%                 | 0.53%        | 40.2       |
| L5         | 100            | <b>2.2%</b>       | <b>0.1%</b>      | <b>2.6</b>       | 0.00%                 | 0.37%        | 15.3       |
| L6         | 100            | <b>1.1%</b>       | <b>0.1%</b>      | <b>2.0</b>       | 0.00%                 | 0.26%        | 5.9        |
| L7         | 115            | <b>1.2%</b>       | <b>0.1%</b>      | <b>3.3</b>       | 0.00%                 | 0.27%        | 7.4        |
| L9         | 83             | <b>0.7%</b>       | <b>0.1%</b>      | <b>3.0</b>       | 0.00%                 | 0.22%        | 4.3        |
| L10        | 58             | <b>1.5%</b>       | <b>0.1%</b>      | <b>2.3</b>       | 0.00%                 | 0.38%        | 8.6        |
| L11        | 70             | <b>3.3%</b>       | <b>0.1%</b>      | <b>2.7</b>       | 0.00%                 | 0.70%        | 33.5       |
| L13        | 105            | <b>2.6%</b>       | <b>0.1%</b>      | <b>1.4</b>       | 0.00%                 | 0.45%        | 20.7       |
| L14        | 72             | <b>2.5%</b>       | <b>0.1%</b>      | <b>2.9</b>       | 0.00%                 | 0.49%        | 19.0       |
| L15        | 66             | <b>3.0%</b>       | <b>0.1%</b>      | <b>3.2</b>       | 0.00%                 | 0.61%        | 26.7       |
| L16        | 66             | <b>3.3%</b>       | <b>0.1%</b>      | <b>2.0</b>       | 0.00%                 | 0.70%        | 33.2       |
| L17        | 65             | <b>2.7%</b>       | <b>0.2%</b>      | <b>5.3</b>       | 0.00%                 | 0.68%        | 27.5       |
| L18        | 90             | <b>1.0%</b>       | <b>0.1%</b>      | <b>2.7</b>       | 0.00%                 | 0.25%        | 5.5        |
| L19        | 43             | <b>0.5%</b>       | <b>0.2%</b>      | <b>3.5</b>       | 0.00%                 | 0.29%        | 4.2        |
| L20        | 74             | <b>2.8%</b>       | <b>0.1%</b>      | <b>2.6</b>       | 0.00%                 | 0.58%        | 25.0       |
| L21        | 34             | <b>3.4%</b>       | <b>0.2%</b>      | <b>3.1</b>       | 0.00%                 | 0.98%        | 35.9       |
| L22        | 63             | <b>5.4%</b>       | <b>0.2%</b>      | <b>3.5</b>       | 0.00%                 | 1.20%        | 85.0       |
| L23        | 57             | <b>3.2%</b>       | <b>0.1%</b>      | <b>2.2</b>       | 0.00%                 | 0.75%        | 32.2       |
| L24        | 49             | <b>5.0%</b>       | <b>0.2%</b>      | <b>4.3</b>       | 0.00%                 | 1.22%        | 73.3       |
| L25        | 61             | <b>0.9%</b>       | <b>0.1%</b>      | <b>3.1</b>       | 0.00%                 | 0.31%        | 5.7        |
| L27        | 38             | <b>1.0%</b>       | <b>0.2%</b>      | <b>4.6</b>       | 0.00%                 | 0.42%        | 7.5        |
| L28        | 42             | <b>7.0%</b>       | <b>0.2%</b>      | <b>1.9</b>       | 0.00%                 | 1.70%        | 126.3      |
| L29        | 29             | <b>4.0%</b>       | <b>0.2%</b>      | <b>4.5</b>       | 0.00%                 | 1.31%        | 50.9       |
| L30        | 42             | <b>2.8%</b>       | <b>0.2%</b>      | <b>4.9</b>       | 0.00%                 | 0.81%        | 27.8       |
| L31        | 18             | <b>0.0%</b>       | <b>0.3%</b>      | <b>5.1</b>       | 0.78%                 | 0.50%        | 4.5        |
| L32        | 27             | <b>4.0%</b>       | <b>0.3%</b>      | <b>6.0</b>       | 0.00%                 | 1.38%        | 52.7       |
| L33        | 45             | 0.0%              | 0.3%             | 11.1             | <b>2.75%</b>          | <b>0.29%</b> | <b>3.6</b> |
| L34        | 33             | <b>0.0%</b>       | <b>0.2%</b>      | <b>4.1</b>       | 0.52%                 | 0.30%        | 3.7        |
| L35        | 26             | <b>1.6%</b>       | <b>0.3%</b>      | <b>5.5</b>       | 0.00%                 | 0.79%        | 14.1       |

**Table S1** Fit statistics for observed r-protein pulse labeling kinetics.

<sup>a</sup>Number of fitted isotope distributions points observed for each r-protein in the pulse labeling timecourse.

<sup>b</sup>Fitted relative pool size **P**, reported values highlighted in bold.

<sup>c</sup>Estimated s.d. of the parameter.

<sup>d</sup>Reduced chi-squares values for the fits, calculated from an estimated error of 0.4% s.d. and  $n - 2$  degrees of freedom.

<sup>e</sup>Turnover rate per generation, reported values are highlighted in bold.
